# Supplementary material
Source: PubMed Central journal article supplement (PMC1829222)
Supplement: pnas_0611338104_1.pdf [file pnas_0611338104_1.pdf]

**A**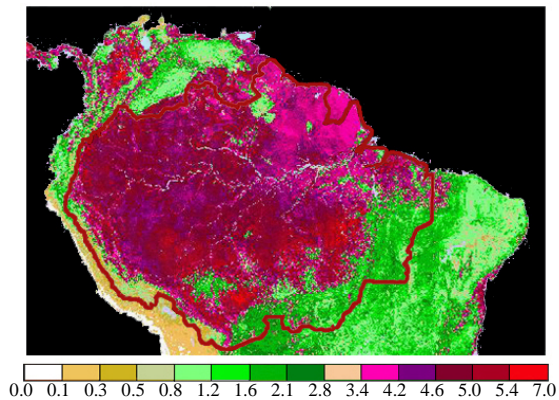

Annual Average Leaf Area Index

**B**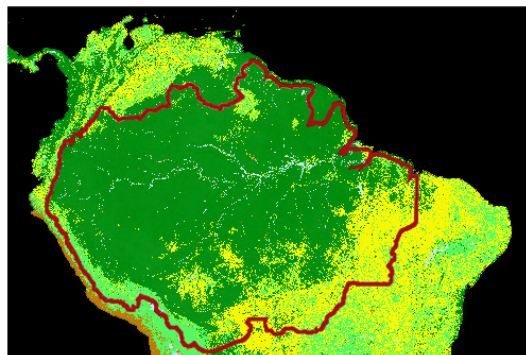

|         |               |
|---------|---------------|
| Forests | Savannas      |
| Other   | Non-vegetated |

**C**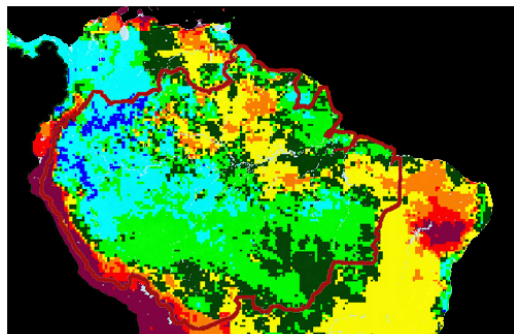

1 - 2 3 - 4 5 6 7 8 9 - 10 11 - 12

Number of Dry Months in a Year
