# Supplementary material
Source: PubMed Central journal article supplement (PMC1829222)

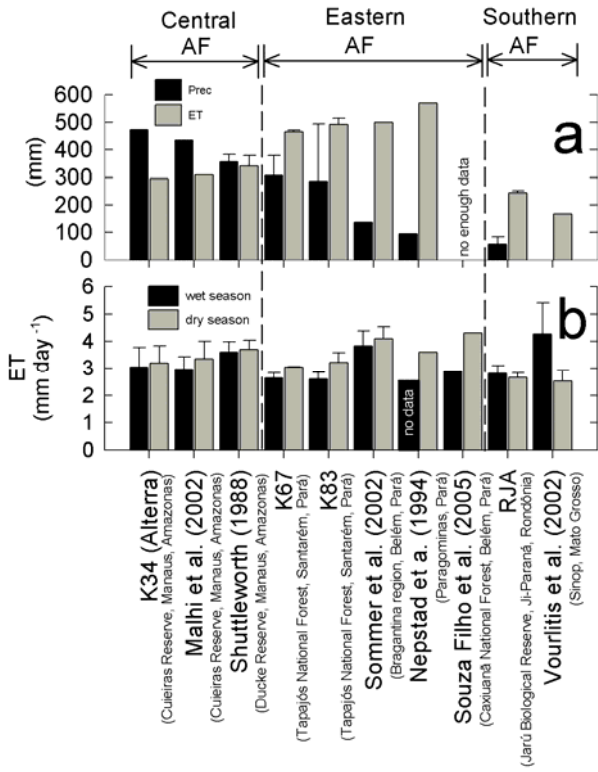

Supplement: pnas_0611338104_2.pdf [file pnas_0611338104_2.pdf]

**A**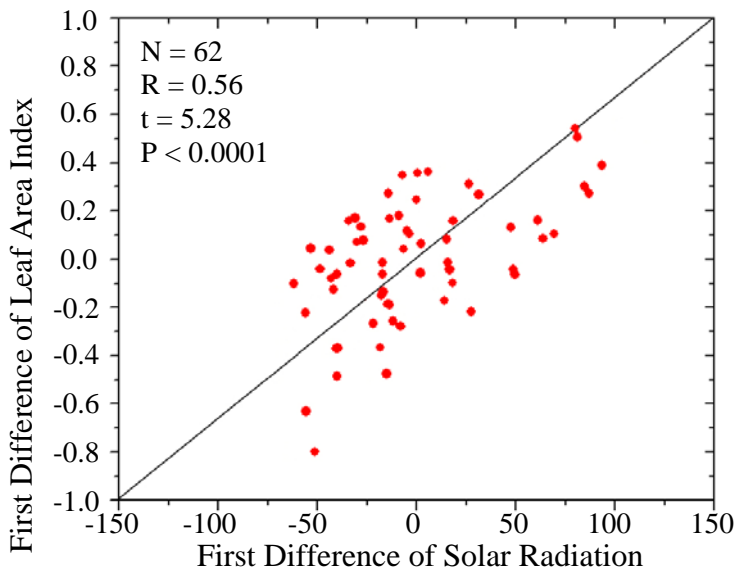**B**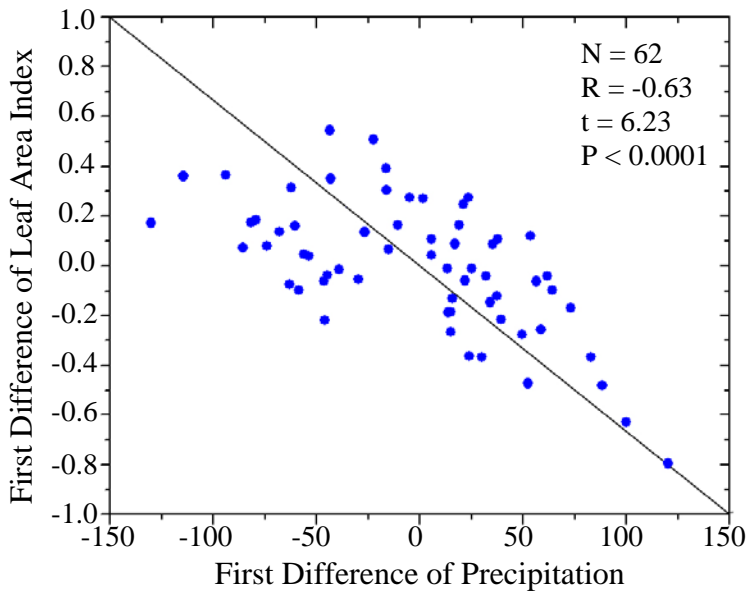

Supplement: pnas_0611338104_3.pdf [file pnas_0611338104_3.pdf]

**A**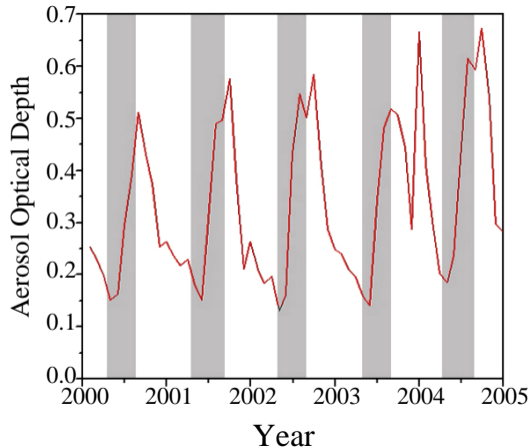**B**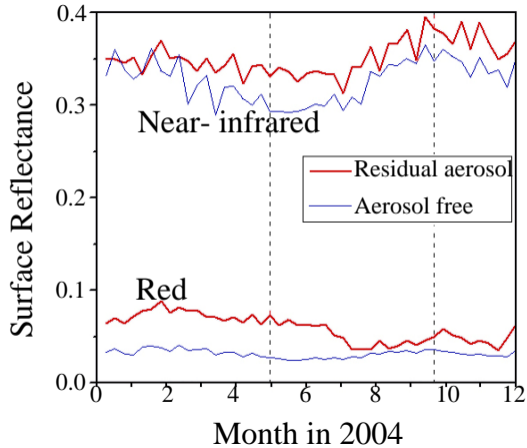

Supplement: pnas_0611338104_4.pdf [file pnas_0611338104_4.pdf]
